# Supplementary material
Source: publisher figshare collection journal article supplement (https://acs.figshare.com/ndownloader/files/3858892)
Supplement: Supplementary file 1 [file 3858892]

## Supplementary 2: Movies of single chain: extension of Figure 10

Jan Zidek, Josef Jancar, Andrey Milchev, Thomas A. Vilgis

July 21, 2014

The Figure 10 in main document is a simulation result completed by illustration. The attachment shows the original visualization of single chain. Moreover it shows a movie with evolution of single chain during loading/unloading cycle.

single\_chain.mpg simple movie.

single\_chain\_stereo.avi stereoscopic movie compatible with 3D screens, tablets and TV sets. (side-by-side format).
